# Supplementary material
Source: publisher site journal article supplement (https://www.spandidos-publications.com/5239/downloadSupplementary)

Figure S1. Sensitivity analysis of comparison in the number of pelvic lymph nodes retrieved by robotic surgery and laparoscopic surgery. Standard mean difference was presented on the x-axis.

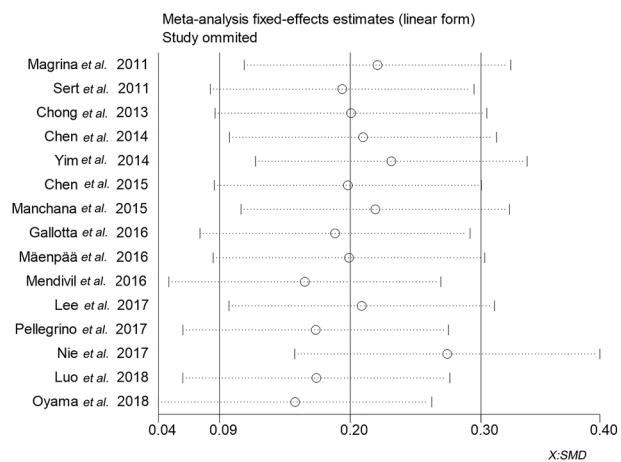

Figure S2. Sensitivity analysis of comparison in the number of para-aortic lymph nodes retrieved by robotic surgery and laparoscopic surgery. Standard mean difference was presented on the x-axis.

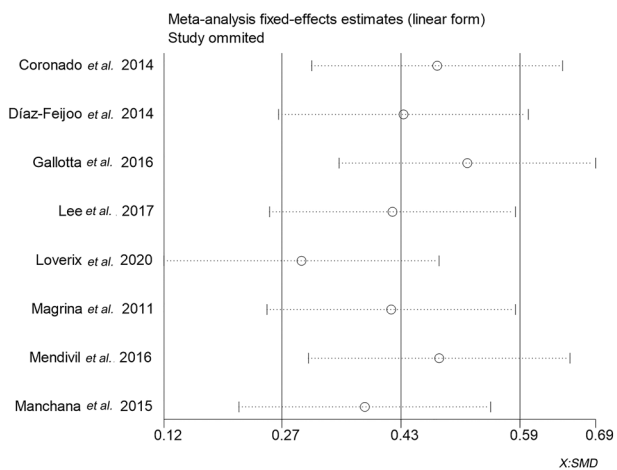

Figure S3. Sensitivity analysis of the comparison of operation time between robotic surgery and laparoscopic surgery. Standard mean difference was presented on the x-axis.

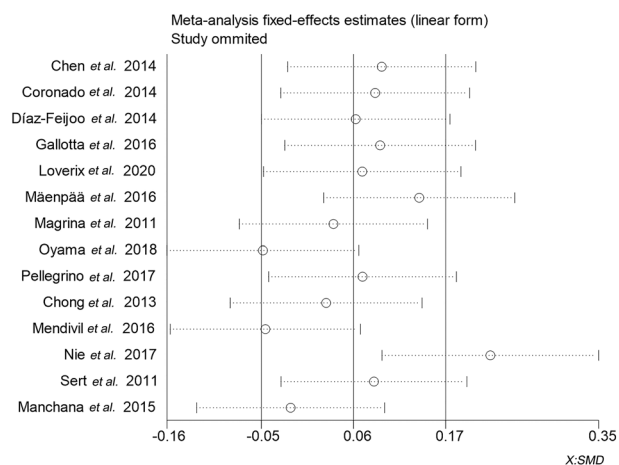

Figure S4. Sensitivity analysis of the comparison of estimated blood loss between robotic surgery and laparoscopic surgery. Standard mean difference was presented on the x-axis.

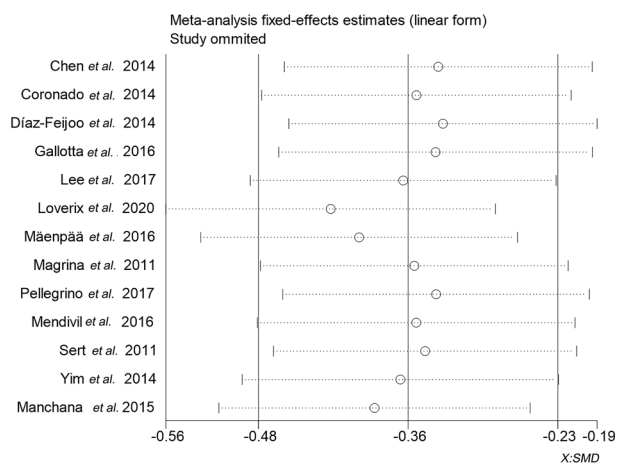

Figure S5. Sensitivity analysis of the comparison in recurrence rate between robotic surgery and laparoscopic surgery. Standard mean difference was presented on the x-axis.

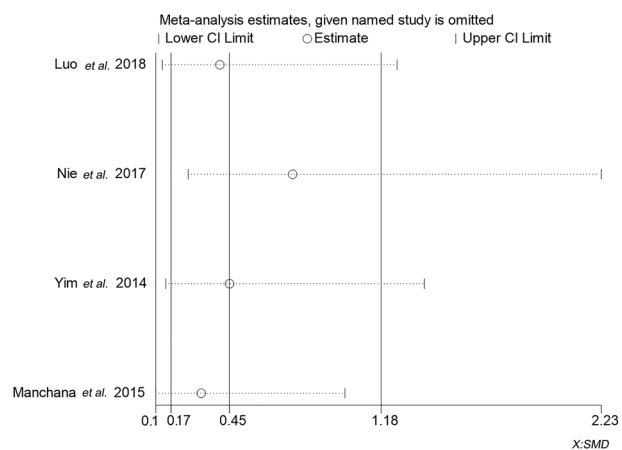

Figure S6. Sensitivity analysis of the comparison in mortality rate between robotic surgery and laparoscopic surgery. Standard mean difference was presented on the x-axis.

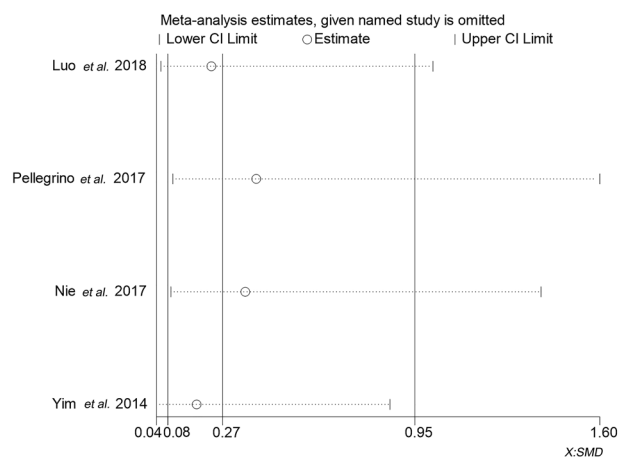

Supplement: Supplementary file 1 [file downloadSupplementary]
